# Supplementary material
Source: HighWire-hosted journal article supplement (http://rc.rcjournal.com/highwire/filestream/28335/field_highwire_adjunct_files/4/rc-11781-File008.docx)
Supplement: rc-11781-File008.docx [file rc-11781-File008.docx]

**Supplement 5.** Risk of bias in non-randomized studies of interventions (ROBINS I tool)

| **Studies** |  | **Risk of bias domains** | | | | |  |
| --- | --- | --- | --- | --- | --- | --- | --- |
| **D1** | **D2** | **D3** | **D4** | **D5** | **D6** | **D7** |
| Kirschenbaum et al., 2002 31 | Low | Low | Low | Moderate | Low | Moderate | Moderate |
| Wang et al., 2003 32 | Low | Low | Low | Moderate | Low | Low | Low |

Domains:

D1: Bias due to confounding

D2: Bias due to selection of participants

D3: Bias in classification of interventions

D4: Bias due to deviations from intended interventions

D5: Bias due to missing data

D6: Bias in measurement of outcomes

D7: Bias in selection of the reported result
